# Supplementary material for: Zirconium bis(pyridonate): a modified amidate complex for enhanced substrate scope in aminoalkene cyclohydroamination
Source: Royal Society of Chemistry journal article supplement (doi:10.1039/b913393c), 2009-10-12
Supplement: b913393c.pdf [file b913393c.pdf]

## Supplementary Information for

### A Zirconium Bis(amidate) Complex Exhibiting Improved Aminoalkene Cyclohydroamination Activity

Jason A. Bexrud, and Laurel L. Schafer.

*Department of Chemistry, University of British Columbia, 2036 Main Mall, Vancouver, B.C,  
Canada, V6T 1Z1.*

**General.**  $^1\text{H}$  and  $^{13}\text{C}$  NMR spectra were recorded on either a Bruker 300 MHz or 400 MHz Avance spectrometer at ambient temperature and chemical shifts are given relative to residual solvent. GCMS spectra were recorded on an Agilent series 6890 GC system with a 5973 Mass Selective Detector. Single crystal X-ray structure determinations, MS, and elemental analyses determinations were performed at the Department of Chemistry, University of British Columbia. All reactions were carried out using standard Schlenk line and glovebox techniques under an atmosphere of nitrogen, unless described otherwise.  $\text{Ti}(\text{NMe}_2)_4$  and  $\text{Zr}(\text{NMe}_2)_4$  were purchased from Strem and used as received. *d*<sub>8</sub>-Toluene was degassed and dried over molecular sieves. Amino alkenes 2,2-diphenyl-4-pentenylamine,<sup>1</sup> 2,2-diphenyl-5-hexenylamine,<sup>2</sup> 2,2,5-triphenyl-4-pentenylamine,<sup>2,3</sup> 2,2-diphenyl-4-hexenylamine,<sup>2</sup> 2,2-dimethyl-4-pentenylamine,<sup>3</sup> and 1-methyl-4-pentenylamine<sup>4</sup> were prepared as described in the literature with some modification from commercially available starting materials purchased from Aldrich. Amino alkene substrates were dried over CaH or 4Å molecular sieves and degassed prior to use. Heterocyclic products 2-methyl-4,4-diphenylpyrrolidine,<sup>1</sup> 2-methyl-5,5-diphenylpiperidine,<sup>5</sup> 2-methyl-4,4-dimethylpyrrolidine,<sup>3</sup> 2-benzyl-4,4-diphenylpyrrolidine,<sup>6</sup> 2,5-dimethylpyrrolidine<sup>7</sup> and (+/-)-(S,S)-3,3-diphenyl-1-(*p*-toluenesulfonyl)-octahydro-indole<sup>8</sup> are known compounds. The 6-*tert*-butyl-3-phenyl-2-pyridone proligand was prepared as described in the literature<sup>9</sup> and was heated to 80 °C under vacuum for at least three days prior to use. 2-Cyclohex-2-enyl-2,2-diphenylethylamine was prepared using modified literature procedures<sup>10</sup> from commercially available starting materials with full characterization data provided below. 1,3,5-Trimethoxybenzene purchased from Aldrich, was used as an internal standard and was sublimed under vacuum prior to use.

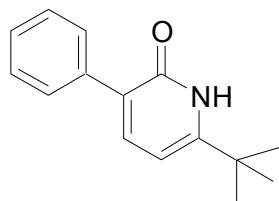

**6-tert-Butyl-3-phenyl-2-pyridone.**<sup>9</sup> <sup>1</sup>H NMR (CDCl<sub>3</sub>, 300 MHz): δ 1.38 (9H, s, - (CH<sub>3</sub>)<sub>3</sub>), 6.19 (1H, d, J = 7.4 Hz, C5-H), 7.24 – 7.41 (3H, m, Ar-H), 7.55 (1H, d, J = 7.4 Hz, C4-H), 7.78 – 7.81 (2H, m, Ar-H), 12.00 (1H, br s, NH); <sup>13</sup>C NMR (CDCl<sub>3</sub>, 101 MHz): δ 28.9, 34.8, 101.8, 127.2, 127.7, 127.9, 128.3, 136.6, 139.1, 156.2, 163.5; MS (EI): *m/z* 227 (M<sup>+</sup>).

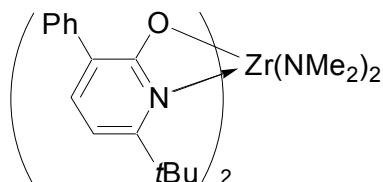

**Bis(6-tert-butyl-3-phenyl-2-pyridonate) zirconium bis(dimethylamido) complex 1.** All metal complex synthesis reactions were carried out in a glovebox unless otherwise stated. To a small screw capped vial containing a magnetic stir bar was added 6-tert-butyl-3-phenyl-2-pyridone (0.850 g, 3.7 mmol), benzene (3 ml), and tetrakis(dimethylamido)zirconium (0.500 g, 1.9 mmol in 2ml of benzene). The mixture was then stirred at room temperature for 20 h. The solvents were then removed under reduced pressure to afford the analytically pure bis(6-tert-butyl-3-phenyl-2-pyridonato)zirconium-bis(dimethylamido) complex **1** as a pale yellow microcrystalline solid. Yield: > 98%. Crystals suitable for X-ray crystallography were obtained from a saturated solution of the complex in benzene/pentanes. <sup>1</sup>H NMR (CDCl<sub>3</sub>, 400 MHz): δ 1.26 (18H, s, -C(CH<sub>3</sub>)<sub>3</sub>), 3.26 (12H, s, Zr-(N(CH<sub>3</sub>)<sub>2</sub>)<sub>2</sub>), 6.57 (2H, d, J= 8 Hz, Ar-H), 7.25 (2H, m, Ar-H), 7.44 (4H, m, Ar-H), 7.55 (2H, d, J= 8 Hz, Ar-H), 8.07 (4H, m, Ar-H); <sup>13</sup>C NMR (CDCl<sub>3</sub>, 100 MHz): δ 29.7, 36.3, 42.6, 110.1, 121.1, 128.4, 128.9, 137.2, 140.4, 165.3; MS (EI): *m/z* 631 (M<sup>+</sup>), 587 (M-NMe<sub>2</sub>), 543 (M-2NMe<sub>2</sub>); Anal. Calcd for C<sub>34</sub>H<sub>44</sub>N<sub>4</sub>O<sub>2</sub>Zr: C, 64.62; H, 7.02; N, 8.87. Found: C, 64.71; H, 7.18; N, 9.07.

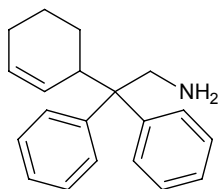

**2-(Cyclohex-2-enyl)-2,2-diphenyl-ethylamine.**<sup>10</sup> <sup>1</sup>H NMR (CDCl<sub>3</sub>, 400 MHz): δ 0.77 (2H, br s, -NH<sub>2</sub>), 0.9 – 1.1 (1H, m, -CH<sub>2</sub>-CHH-CH-CH=CH-), 1.5 – 1.6 (2H, m, -

CH<sub>2</sub>-CH<sub>2</sub>-CH<sub>2</sub>-), 1.6 – 1.8 (1H, m, -CH=CH-CHH-CH<sub>2</sub>-), 1.8 – 2.0 (2H, m, -CH=CH-CHH-CH<sub>2</sub>-, -CH<sub>2</sub>-CHH-CH-CH=CH-), 3.2 – 3.4 (2H, m, -CH=CH-CH-, -Ph<sub>2</sub>C-CHH-NH<sub>2</sub>), 3.45 (1H, d, J = 13.2 Hz, -Ph<sub>2</sub>C-CHH-NH<sub>2</sub>), 5.5 – 5.7 (1H, m, -CH=CH-), 5.8 – 5.9 (1H, m, -CH=CH-), 7.1 – 7.4 (10H, m, ArH); <sup>13</sup>C NMR (CDCl<sub>3</sub>, 101 MHz): δ 22.59, 24.97, 25.18, 39.77, 49.65, 56.74, 126.15, 126.20, 127.50, 127.92, 129.07, 129.38, 129.76, 129.90, 142.80, 144.80; MS (EI): *m/z* 276 (M-H<sup>+</sup>). Anal. Calcd for C<sub>20</sub>H<sub>23</sub>N: C, 86.59; H, 8.36; N, 5.05. Found: C, 86.39; H, 8.39; N, 5.04.

**General procedure for NMR-tube scale intramolecular amino alkene hydroamination.** All NMR-tube scale reactions were prepared in an N<sub>2</sub>-filled glove box. A J. Young NMR-tube equipped with a Teflon screw cap would be charged with the internal standard (1,3,5-trimethoxybenzene) (0.5 mmol), the catalyst (0.025 mmol), and the amino alkene (0.5 mmol) dissolved in either *d*<sub>6</sub>-benzene (~1 ml), *d*<sub>10</sub>-xylenes (~1 ml) or *d*<sub>8</sub>-toluene (~1 ml). The tube would then be sealed, heated to, and maintained at, the appropriate temperature for the stated duration of time. The conversion and yield were determined by comparing the integration of the internal standard with a well resolved signal for the cyclic product.

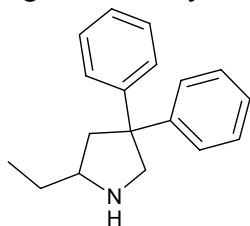

**2-Ethyl-4,4-diphenylpyrrolidine.** <sup>1</sup>H NMR (CDCl<sub>3</sub>, 400 MHz): δ 0.97 (3H, t, J = 7.4 Hz, -CH<sub>2</sub>-CH<sub>3</sub>), 1.49 – 1.70 (2H, m, -CH-CH<sub>2</sub>-CH<sub>3</sub>), 2.10 (1H, dd, J = 9.6, 12.7 Hz, Ph<sub>2</sub>C-CHH-CH(Et)-NH-), 2.77 (1H, dd, J = 9.6, 12.6 Hz, Ph<sub>2</sub>C-CHH-CH(Et)-NH-), 3.15 – 3.24 (1H, m, -CH<sub>2</sub>-CH(Et)-NH-), 3.34 (1H, br s, -NH-), 3.47 (1H, d, J = 11.5 Hz, Ph<sub>2</sub>C-CHH-NH-), 3.80 (1H, d, J = 11.5 Hz, Ph<sub>2</sub>C-CHH-NH-), 7.15 – 7.40 (10H, m, ArH); <sup>13</sup>C NMR (CDCl<sub>3</sub>, 75 MHz): δ 12.6, 30.5, 45.7, 57.4, 58.0, 60.7, 127.2, 127.9, 128.0, 129.4, 129.5, 147.4, 148.2; HRMS Calcd for C<sub>18</sub>H<sub>21</sub>N [M<sup>+</sup>]: 251.16740; Found: 251.16720.

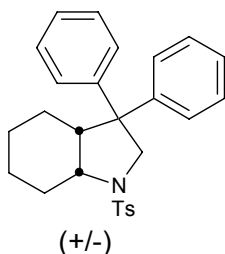

**(+/-)-(S,S)-3,3-Diphenyl-1-(*p*-toluenesulfonyl)octahydroindole.**<sup>8</sup> The hydroamination reaction was prepared in an N<sub>2</sub>-filled glovebox. A J. Young NMR-tube equipped with a Teflon screw cap was charged with a solution of the precatalyst (0.032 g, 0.05 mmol) and 2-(cyclohex-2-enyl)-2,2-diphenylethylamine (0.069 g, 0.25 mmol)

dissolved in *d*<sub>8</sub>-toluene (~ 1 ml). The NMR-tube was then sealed and heated to 145 °C for 168 hours. Following this the solution was concentrated under reduced pressure and the crude hydroamination mixture was transferred to a small round bottomed flask containing TsCl (1.3 eq) and NEt<sub>3</sub> (3.3 eq), dissolved in CH<sub>2</sub>Cl<sub>2</sub> (2-3 ml). This mixture was then stirred over night at room temperature. Following aqueous workup, purification by column chromatography (36:1 hexanes/EtOAc, SiO<sub>2</sub>) afforded 0.056 g (52%) of the analytically pure (+/-)-(S,S)-3, 3-diphenyl-1-(*p*-toluenesulfonyl)-octahydro-indole as a colorless foam. <sup>1</sup>H NMR (CDCl<sub>3</sub>, 400 MHz): δ 1.10 – 1.30 (2H, m), 1.40 – 1.65 (5H, m), 2.32 (3H, s), 2.40 – 2.60 (1H, m), 2.90 – 3.0 (1H, m), 3.70 – 3.80 (1H, m), 4.25 (1H, d, J = 11 Hz), 4.48 (1H, d, J = 11 Hz), 6.90 – 7.60 (14H, m, ArH); <sup>13</sup>C NMR (CDCl<sub>3</sub>, 101 MHz): δ 21.1, 22.4, 25.4, 26.4, 29.7, 45.2, 56.4, 59.1, 60.0, 126.6, 127.0, 127.6, 128.0, 128.5, 129.3, 129.5, 130.2, 135.3, 143.7, 144.8, 146.1; MS (ESI): *m/z* 454 (M + Na<sup>+</sup>). Anal. Calcd for C<sub>27</sub>H<sub>29</sub>NO<sub>2</sub>S: C, 75.14; H, 6.77; N, 3.25. Found: C, 75.04; H, 6.84; N, 3.20.

**Table 1.** Crystallographic parameters for complex 1.

|                                              |                                                                  |
|----------------------------------------------|------------------------------------------------------------------|
| Formula                                      | C <sub>34</sub> H <sub>44</sub> N <sub>4</sub> O <sub>2</sub> Zr |
| formula wt                                   | 631.95                                                           |
| cryst dimens, mm                             | 0.5 × 0.5 × 0.5                                                  |
| temp, K                                      | 173                                                              |
| wavelength (Å)                               | 0.71073                                                          |
| cryst syst                                   | Monoclinic                                                       |
| space group                                  | P2 <sub>1</sub> /n                                               |
| a, Å                                         | 13.206(2)                                                        |
| b, Å                                         | 17.563(3)                                                        |
| c, Å                                         | 13.563(3)                                                        |
| α, deg                                       | 90                                                               |
| β, deg                                       | 92.226(11)                                                       |
| γ, deg                                       | 90                                                               |
| V, Å <sup>3</sup>                            | 3143.4(9)                                                        |
| Z                                            | 4                                                                |
| D <sub>c</sub> , Mg/m <sup>3</sup>           | 1.335                                                            |
| abs coeff, mm <sup>-1</sup>                  | 0.386                                                            |
| F(000)                                       | 1328                                                             |
| θ range, deg                                 | 1.90 – 34.98                                                     |
| index ranges                                 | -20 ≤ h ≤ 19<br>-27 ≤ k ≤ 28<br>-21 ≤ l ≤ 19                     |
| No. of rflns                                 | 53325                                                            |
| No. of indep rflns                           | 13181                                                            |
| No. of data /restraints /params              | 13181/0/370                                                      |
| goodness of fit on F <sup>2</sup>            | 0.981                                                            |
| final R indices ( <i>I</i> > 2σ( <i>I</i> )) | 0.0419,<br>0.1020                                                |
| R indices (all data)                         | 0.0820,<br>0.1235                                                |

Representative  $^1\text{H}$  and  $^{13}\text{C}$  NMR Spectra are appended.

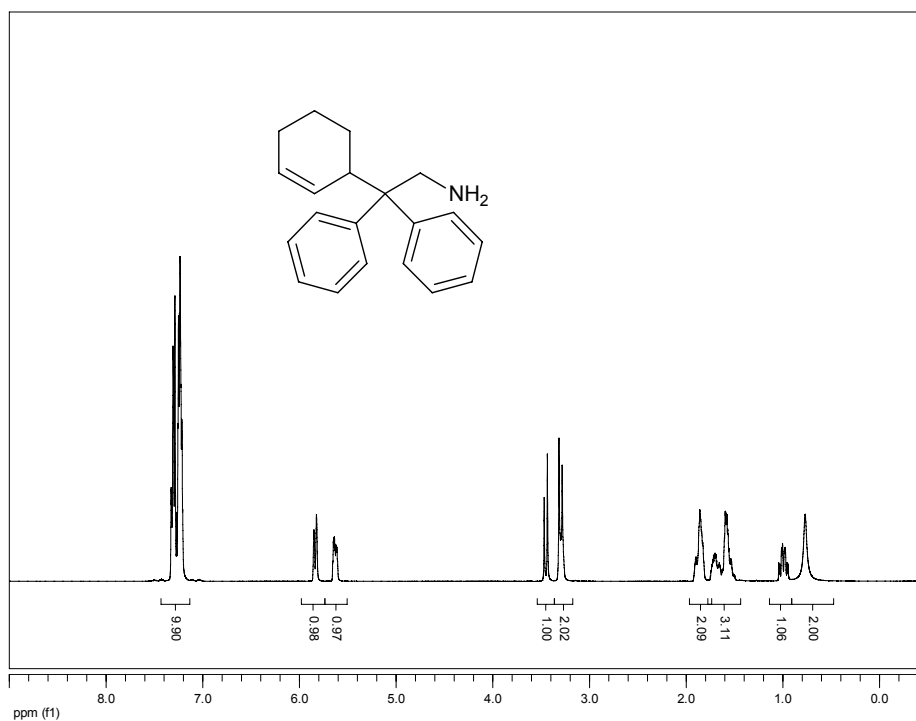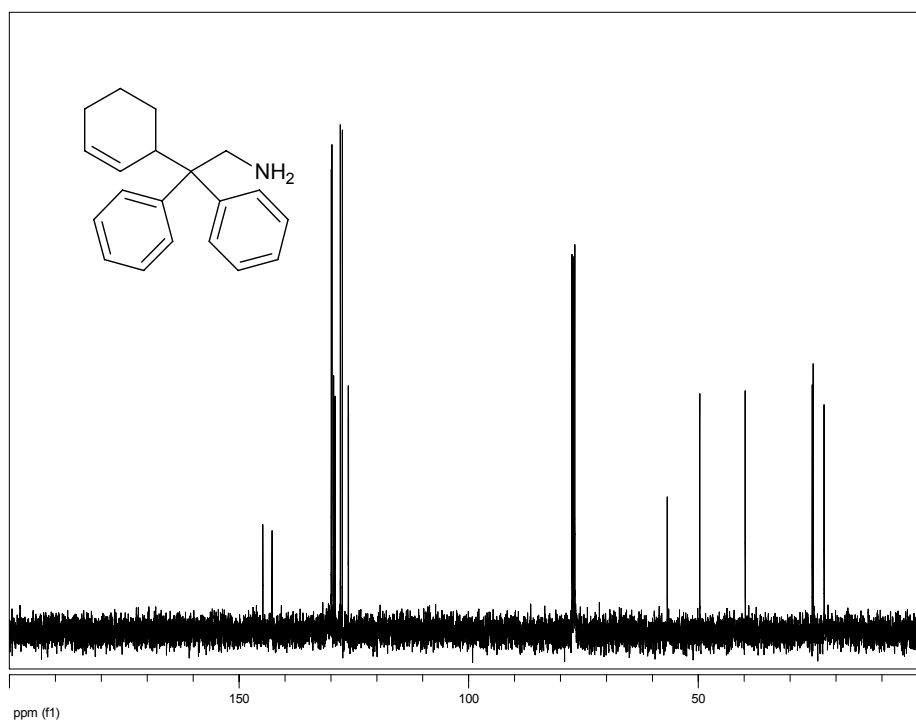

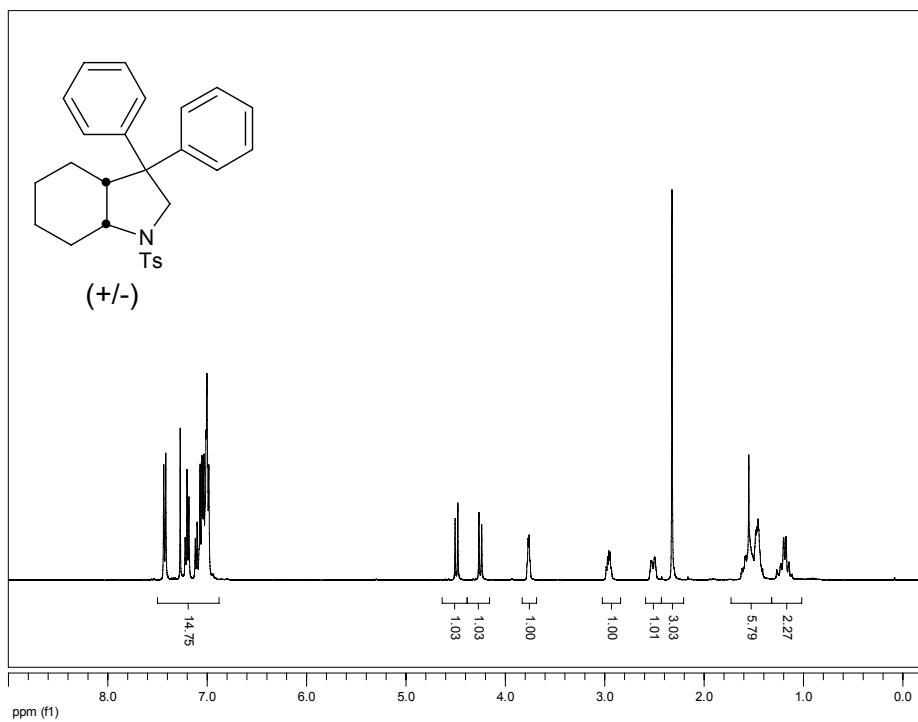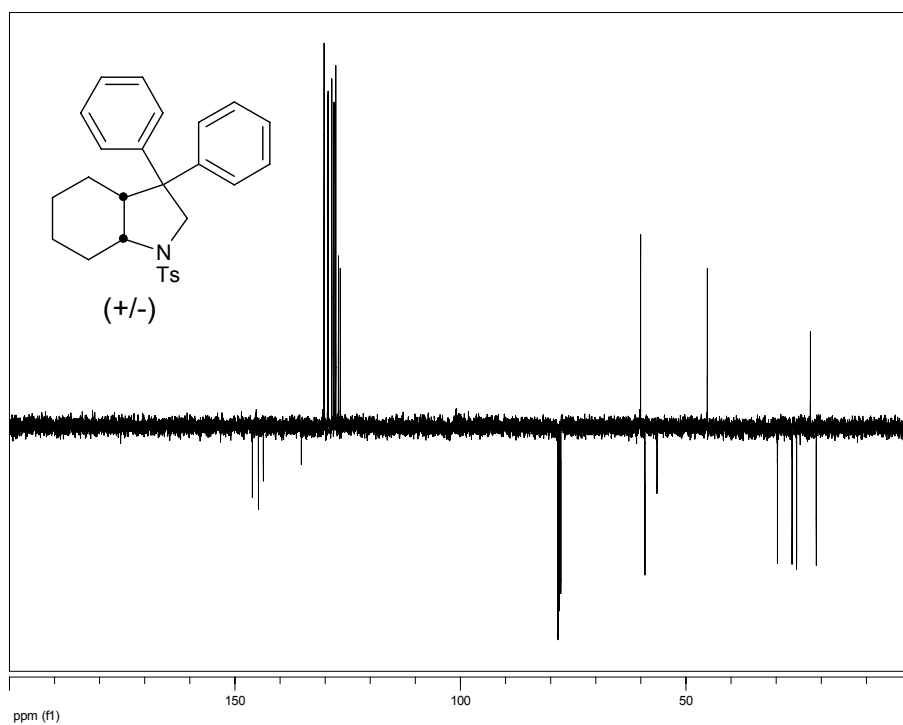

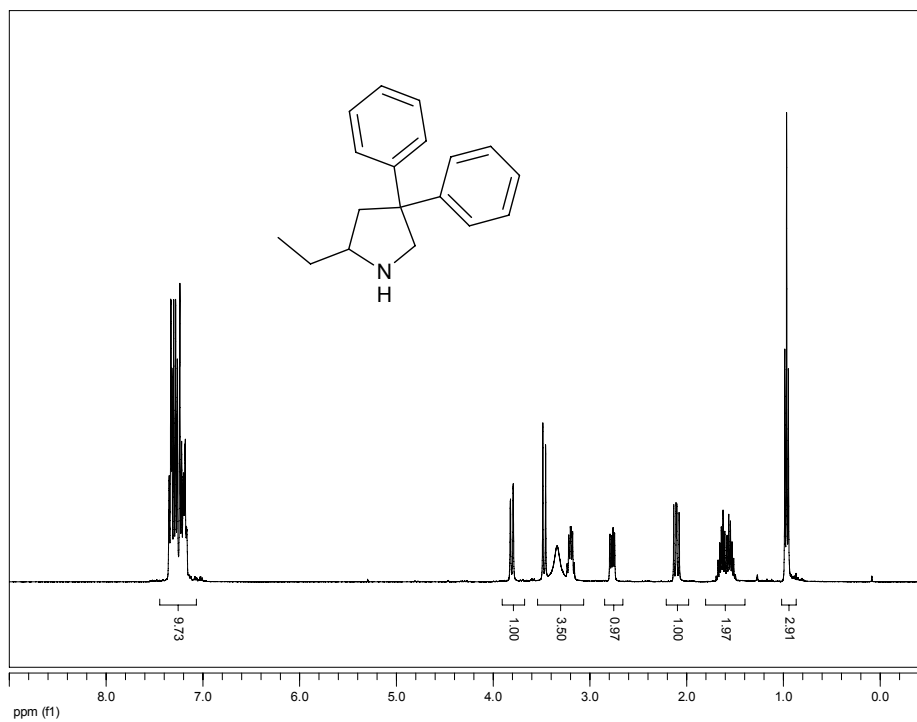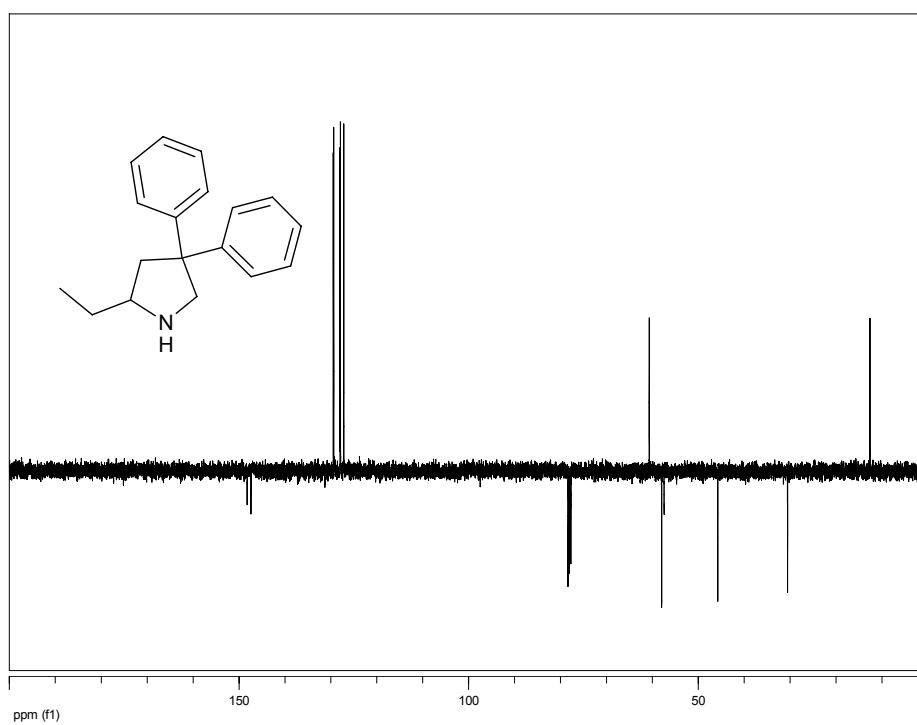

## References

- (1) Hong, S.; Tian, S.; Metz, M. V.; Marks, T. J. *J. Am. Chem. Soc.* **2003**, *125*, 14768.
- (2) Kondo, T.; Okada, T.; Mitsudo, T. *J. Am. Chem. Soc.* **2002**, *124*, 186.
- (3) Black, D. St. C.; Doyle, J. E. *Aust. J. of Chem.* **1978**, *31*, 2247.
- (4) Clark, A.J.; Deeth, R.J.; Samuel, C.J.; Wongtap, H. *Synlett* **1999**, *4*, 444.
- (5) Lauterwasser, F.; Hayes, P. G.; Brase, S.; Piers, W.; Schafer, L.L. *Organometallics* **2004**, *23*, 2234.
- (6) Bexrud, J. A.; Beard, J. D.; Leitch, D. C.; Schafer, L. L. *Org. Lett.* **2005**, *7*, 1959.
- (7) (a) Gagne, M.R.; Stern, C.L.; Marks, T.J. *J. Am. Chem. Soc.* **1992**, *114*, 275.  
(b) Harding, K.E.; Burks, S.R. *J. Org. Chem.* **1981**, *46*, 3920.
- (8) Zhang, J.; Yang, C.G.; He, C. *J. Am. Chem. Soc.* **2006**, *128*, 1798.
- (9) Overmann, L.E.; Tsuboi, S.; Roos, J.P.; Taylor, G.F. *J. Am. Chem. Soc.* **1980**, *102*, 747.
- (10) Beak, P.; Covington, J.B. *J. Am. Chem. Soc.* **1978**, *100*, 3961.
